# Accelerated Activation of SOCE Current in Myotubes from Two Mouse Models of Anesthetic- and Heat-Induced Sudden Death

Viktor Yarotsky<sup>1</sup>, Feliciano Protasi<sup>2</sup>, Robert T. Dirksen<sup>1\*</sup>

**1** Department of Physiology and Pharmacology, University of Rochester Medical Center, Rochester, New York, United States of America, **2** Center for Research on Ageing & Department of Neuroscience and Imaging, Università Gabriele d'Annunzio, Chieti, Italy

## Abstract

Store-operated calcium entry (SOCE) channels play an important role in  $\text{Ca}^{2+}$  signaling. Recently, excessive SOCE was proposed to play a central role in the pathogenesis of malignant hyperthermia (MH), a pharmacogenetic disorder of skeletal muscle. We tested this hypothesis by characterizing SOCE current ( $I_{\text{SKCRAC}}$ ) magnitude, voltage dependence, and rate of activation in myotubes derived from two mouse models of anesthetic- and heat-induced sudden death: 1) type 1 ryanodine receptor (RyR1) knock-in mice (Y524S/+) and 2) calsequestrin 1 and 2 double knock-out (dCasq-null) mice.  $I_{\text{SKCRAC}}$  voltage dependence and magnitude at -80 mV were not significantly different in myotubes derived from wild type (WT), Y524S/+ and dCasq-null mice. However, the rate of  $I_{\text{SKCRAC}}$  activation upon repetitive depolarization was significantly faster at room temperature in myotubes from Y524S/+ and dCasq-null mice. In addition, the maximum rate of  $I_{\text{SKCRAC}}$  activation in dCasq-null myotubes was also faster than WT at more physiological temperatures (35–37°C). Azumolene (50  $\mu\text{M}$ ), a more water-soluble analog of dantrolene that is used to reverse MH crises, failed to alter  $I_{\text{SKCRAC}}$  density or rate of activation. Together, these results indicate that while an increased rate of  $I_{\text{SKCRAC}}$  activation is a common characteristic of myotubes derived from Y524S/+ and dCasq-null mice and that the protective effects of azumolene are not due to a direct inhibition of SOCE channels.

**Citation:** Yarotsky V, Protasi F, Dirksen RT (2013) Accelerated Activation of SOCE Current in Myotubes from Two Mouse Models of Anesthetic- and Heat-Induced Sudden Death. PLoS ONE 8(10): e77633. doi:10.1371/journal.pone.0077633

**Editor:** Mohamed Trebak, SUNY College of Nanoscale Science and Engineering, United States of America

**Received:** July 25, 2013; **Accepted:** September 11, 2013; **Published:** October 15, 2013

**Copyright:** © 2013 Yarotsky et al. This is an open-access article distributed under the terms of the Creative Commons Attribution License, which permits unrestricted use, distribution, and reproduction in any medium, provided the original author and source are credited.

**Funding:** This work was supported by: a research grant from the National Institutes of Health (NIH) (AR059646 to RTD), the Italian Telethon Foundation (GGP08153 to FP), and a career development K01 award from the NIH (AR060831 to VY). The funders had no role in study design, data collection and analysis, decision to publish, or preparation of the manuscript.

**Competing interests:** The authors have declared that no competing interests exist.

\* E-mail: robert\_dirksen@urmc.rochester.edu

## Introduction

Malignant hyperthermia (MH) is a pharmacogenetic disorder triggered by exposure to halogenated anesthetics (e.g. halothane) and depolarizing skeletal muscle relaxants (e.g. succinylcholine) [1]. MH episodes are characterized by a dramatic rise in core body temperature, respiratory acidosis, skeletal muscle rigidity, hypermetabolism, rhabdomyolysis, hyperkalemia, and cardiac arrhythmia [1]. MH attacks are lethal if not reversed rapidly by removal of triggering agent, cooling the patient, and administration of dantrolene, the only FDA-approved antidote for an MH crisis [2]. Interestingly, some MH susceptible individuals have experienced similar life-threatening non-anesthetic hypermetabolic reactions upon exposure to heat stress (hot temperatures and high humidity), strenuous exercise, or febrile illness [3–9].

MH crises result from uncontrolled  $\text{Ca}^{2+}$  release from the sarcoplasmic reticulum (SR) that ultimately leads to a dramatic

and sustained rise in intracellular  $\text{Ca}^{2+}$  [1]. MH in humans usually results from missense mutations in the type I ryanodine receptor (RyR1), which functions as the  $\text{Ca}^{2+}$  release channel in the sarcoplasmic reticulum (SR) of skeletal muscle [1]. Recently, multiple mouse models for heat- and halothane-induced sudden death were developed including knock-in of mutations in RyR1 linked to MH in humans [10,11] and knockout of calsequestrin1 (Casq1) [12,13], the primary SR  $\text{Ca}^{2+}$  binding protein in skeletal muscle. The Y524S mutation increases RyR1  $\text{Ca}^{2+}$  leak and susceptibility to activation. Y524S knock-in mice exhibit anesthetic- and heat-induced sudden death and are an established mouse model of MH [10,14]. On the other hand, Casq1 deficiency results in both reduced SR  $\text{Ca}^{2+}$  storage and loss of Casq1-mediated regulation of RyR1  $\text{Ca}^{2+}$  release [12,15]. Like Y524S mice, Casq1-null mice also exhibit anesthetic- and heat-induced sudden death, but mutations in the CASQ1 gene have not been linked to MH in humans [12,13].

Recent evidence suggests that SR  $\text{Ca}^{2+}$  depletion due to uncontrolled  $\text{Ca}^{2+}$  release during an MH episode activates store-operated calcium entry (SOCE), which exacerbates  $\text{Ca}^{2+}$  overload and hypermetabolism during an MH crisis. Indeed, early studies conducted during the development of the *in vitro* caffeine and halothane contracture test, the gold standard for MH diagnosis in North America, revealed that this test fails when conducted using  $\text{Ca}^{2+}$ -free extracellular solutions [16-19]. More recently, increased SOCE activation during halothane-induced  $\text{Ca}^{2+}$  release was demonstrated in mechanically skinned human skeletal muscle fibers from MH susceptible patients [20]. Indirect measures of SOCE have suggested an inverse relationship between the level of Casq1 expression and the magnitude of SOCE in myotubes [21] and adult muscle fibers [22]. In addition, SOCE was reduced by preincubation of myotubes and muscle fibers with azumolene, a more water-soluble dantrolene analog [22,23].

Together, these studies provide provocative evidence for a central pathogenic role of SOCE in the intracellular  $\text{Ca}^{2+}$  overload in skeletal muscle that occurs during an MH crisis. However, direct measurements of SOCE channel activity and sensitivity to block by dantrolene/azumolene in skeletal muscle cells from an established MH mouse model have not been tested. Therefore, we used a whole-cell voltage clamp technique described previously [24] to characterize the magnitude, voltage dependence, and activation rate of the SOCE current in myotubes (termed  $I_{\text{SKCRAC}}$ ) derived from *Ryr1*<sup>Y524S/+</sup> (Y524S/+) knock-in mice. We also conducted parallel experiments in homozygous Casq1 and Casq2 double knock-out (dCasq-null) mice that also exhibit anesthetic- and heat-induced sudden death. Finally, we determined the effect of temperature and azumolene on  $I_{\text{SKCRAC}}$  amplitude and activation in myotubes from wild-type, Y524S/+, and dCasq-null mice. The results demonstrate that while SOCE channel activation is faster in Y524S/+, and dCasq-null myotubes and azumolene does not act by directly blocking the SOCE channel current.

## Materials and Methods

### Ethical approval

All animals were housed in a pathogen-free area at the University of Rochester and all experiments were carried out in accordance with procedures reviewed and approved by the University of Rochester University Committee on Animal Resources (UCAR).

### Primary myotube cultures

Myotube cultures were prepared from newborn control wild-type (WT) C57Bl6, heterozygous *Ryr1*<sup>Y524S/+</sup> knock-in (Y524S/+), and homozygous Casq1/2 double knock-out (dCasq-null) mice as previously described [25]. Since mouse myotubes express both the Casq1 and Casq2 isoforms [26], experiments were conducted in myotubes derived from dCasq-null mice in order to assess the impact of Casq deficiency on  $I_{\text{SKCRAC}}$  properties. Mice used to generate myotube cultures were genotyped by PCR analysis of tail snip genomic DNA using previously established protocols [10,27]. All

electrophysiological experiments were performed on individual myotubes from 8-11 day old cultures.

### Whole-cell patch clamp recordings

The whole-cell patch-clamp technique was used to isolate  $I_{\text{SKCRAC}}$  in myotubes using an approach described previously [24]. Briefly, myotubes were bathed in an external recording solution containing (in mM): 138 TEA-Methanesulfonate, 10  $\text{CaCl}_2$ , 10 HEPES, 1  $\text{MgCl}_2$ , 0.1 nifedipine, pH7.4 adjusted with TEA-OH. Low resistance patch pipettes (resistance in the bath ranged from 0.5 - 1.2 Mohm) were filled with an internal solution comprised of (in mM): 140 Cs-Methanesulfonate, 10 HEPES, 20  $\text{Na}_2$ -EGTA, 4  $\text{MgCl}_2$ , pH7.4 adjusted with CsOH. Upon membrane rupture and establishment of whole cell mode, myotubes were voltage clamped at a holding potential of -80 mV and then repetitive ramp depolarizations were delivered every 2 s. Series resistance after compensation (80%) was always <2 Mohms. Each ramp depolarization consisted of a 1 s step to 0 mV (to trigger depolarization-induced  $\text{Ca}^{2+}$  release and inactivate  $\text{Na}^+$  and T-type  $\text{Ca}^{2+}$  channels) followed by a 30 ms step to +40 mV (to further inactivate sodium channels and monitor outward leak current), a 200 ms ramp from +100 mV to -100 mV, and a final 65 ms step to -80 mV.

Whole-cell currents were recorded with an Axopatch 200A amplifier (Molecular Devices, Sunnyvale, CA) and filtered at 2 kHz using an inline four-pole Bessel filter. Data were digitized at 8.3 kHz using a DigiData 1200 interface (Molecular Devices, Sunnyvale, CA). Capacitive currents were minimized (>90%) using the capacitive transient cancellation feature of the amplifier. Cell capacitance ( $C_m$ ) was determined prior to capacitance cancellation by integration of the capacity transient resulting from a +10-mV pulse applied from the holding potential and used to compare  $I_{\text{SKCRAC}}$  current density (pA/pF) obtained from myotubes of different size. Data were collected at room temperature (21-23°C, RT) and physiological temperature (35-37°C, PT) in WT control, Y524S/+, and dCasq-null myotubes.

### Off-line data analyses

All data analyses were performed using Igor Pro 6 (Wavemetrics, Lake Oswego, OR) and Clampfit10 (Molecular Devices, Sunnyvale, CA) software as described previously [24].  $I_{\text{SKCRAC}}$  amplitude was determined by averaging the inward current during 20 ms of the final voltage step to -80 mV at the end of each  $I_{\text{SKCRAC}}$  voltage protocol. The time course of  $I_{\text{SKCRAC}}$  activation was determined by plotting  $I_{\text{SKCRAC}}$  amplitude for each depolarization protocol delivered every 2 seconds.  $I_{\text{SKCRAC}}$  voltage dependence was obtained from individual 200 ms voltage ramp sweeps (1 mV/ms) elicited during each voltage protocol. Ramp currents obtained before  $I_{\text{SKCRAC}}$  activation or the first ramp current elicited upon establishing whole-cell mode were used to subtract linear leak and capacitive currents from sweeps during  $I_{\text{SKCRAC}}$  activation. The time required to reach 10% (T10%), 50% (T50%), and 90% (T90%) of maximal  $I_{\text{SKCRAC}}$  during repetitive depolarization was used as an index of the speed of SOCE channel activation. The maximum rate of SOCE channel activation was determined from the peak of the differential for the time course of

normalized  $I_{\text{SKCRAC}}$  amplitude ( $dI_{\text{Norm}}/dt$ ). All data are presented as mean  $\pm$  standard error of mean. Statistical significance ( $p < 0.05$ ) was determined using a Student's two-tailed  $t$ -test. One-way analysis of variance and Tukey's HSD *post hoc* test was used to test for differences among three or more independent groups.

## Results

### $I_{\text{SKCRAC}}$ activation is accelerated in myotubes from Y524S/+ and dCasq-null mice

We previously described a whole-cell voltage clamp approach to directly quantify the magnitude, voltage dependence, and rate of SOCE current ( $I_{\text{SKCRAC}}$ ) activation in skeletal myotubes [24]. These studies demonstrated that RyR1-dependent SR  $\text{Ca}^{2+}$  depletion governs the rate of  $I_{\text{SKCRAC}}$  activation during repetitive depolarization. Thus, we hypothesized that the enhanced RyR1 sensitivity to activation and increased SR  $\text{Ca}^{2+}$  "leak" in myotubes from Y524S/+ mice would result in an increased rate of  $I_{\text{SKCRAC}}$  activation during repetitive depolarization. To test this prediction, we monitored  $I_{\text{SKCRAC}}$  activation in myotubes from control WT (C57Bl6) and Y524S/+ mice during repetitive ramp depolarization delivered at 0.5 Hz recorded under conditions in which SR  $\text{Ca}^{2+}$  reuptake was inhibited by inclusion of a high intracellular concentration of a strong  $\text{Ca}^{2+}$  buffer (20 mM EGTA) (Figures 1 A and C). Similar to that observed in WT myotubes [24],  $I_{\text{SKCRAC}}$  in Y524S/+ myotubes exhibited strong inward rectification (Figure 1 B) and was inhibited by both 100  $\mu\text{M}$  2-APB ( $103 \pm 3\%$ ,  $n = 7$ ) (Figure 1 C and Figure S1 B in File S1) and 1  $\mu\text{M}$   $\text{Gd}^{3+}$  ( $66.9 \pm 3.4\%$ ,  $n = 7$ ) (Figure S1 A in File S1). The time course of  $I_{\text{SKCRAC}}$  activation during repetitive depolarization was significantly faster in Y524S/+ myotubes (Figure 2A and B). Specifically, the time required for 10% and 50% full activation of  $I_{\text{SKCRAC}}$  during repetitive depolarization (T10% and T50%, respectively) were significantly reduced in myotubes from Y524S/+ mice compared to that from WT mice (Figure 2A, Table S1 in File S1). In addition, also the maximum rate of  $I_{\text{SKCRAC}}$  activation ( $[dI_{\text{Norm}}/dt]_{\text{Max}}$ ), calculated from the peak of the first derivative of the normalized  $I_{\text{SKCRAC}}$  activation time course, was significantly increased in myotubes from Y524S/+ mice (Figure 2 B).

We also hypothesized that a similar increase in the rate of  $I_{\text{SKCRAC}}$  activation would be observed in Casq-null myotubes since Casq deficiency should result in faster store depletion due to the combined effects of reduced SR  $\text{Ca}^{2+}$  storage and loss of Casq-dependent RyR1 inhibition [12,15]. Therefore, we also determined the impact of Casq deficiency on  $I_{\text{SKCRAC}}$  magnitude, voltage-dependence, and rate of activation. Since mouse myotubes express both type 1 and type 2 Casq isoforms [26], we compared  $I_{\text{SKCRAC}}$  magnitude, voltage dependence, and rate of activation in whole-cell voltage clamp experiments of myotubes derived from control WT (C57Bl6) and homozygous dCasq-null [15,27,28] mice (Figures 1 and 2). Similar to that observed for myotubes from Y524S/+ mice,  $I_{\text{SKCRAC}}$  in dCasq-null myotubes activated rapidly during repetitive depolarization (Figure 1 E), exhibited strong inward rectification (Figure 1 F), and was inhibited by both 1  $\mu\text{M}$   $\text{Gd}^{3+}$

( $59.1 \pm 3.9\%$ ,  $n=7$ ) (Figure S1 A in File S1) and 10  $\mu\text{M}$  2-APB ( $94.7 \pm 8.9\%$ ,  $n = 5$ ) (Figure 1 E and Figure S1 B in File S1). In addition, the rate of  $I_{\text{SKCRAC}}$  activation during repetitive depolarization was accelerated in dCasq-null myotubes (Figure 2 A and B). Specifically, T10%, T50%, and T90% were all significantly reduced for dCasq-null myotubes. On average, T10%, T50%, and T90% were reduced on 46%, 40% and 34%, respectively (Figure 2 A, Table S1 in File S1). In addition,  $dI_{\text{Norm}}/dt_{\text{Max}}$  was also significantly increased in myotubes from dCasq-null mice (Figure 2 B). In spite of the increased rate of  $I_{\text{SKCRAC}}$  activation in myotubes from Y524S/+ and Casq-null mice, average ( $\pm$ SE) peak  $I_{\text{SKCRAC}}$  current density at -80 mV was not different between WT ( $1.02 \pm 0.08$  pA/pF,  $n=28$ ), Y524S/+ ( $1.10 \pm 0.10$  pA/pF,  $n = 21$ ), and dCasq-null ( $1.06 \pm 0.09$  pA/pF,  $n=25$ ) myotubes (Figure 2 C), indicating that maximal SOCE channel activity was not altered by either the Y524S mutation in RyR1 or Casq deficiency.

### Temperature accelerates $I_{\text{SKCRAC}}$ activation in myotubes from Y524S/+ and dCasq-null mice

Our previous study demonstrated that  $I_{\text{SKCRAC}}$  activation in control myotubes is increased at physiological temperatures [24]. Therefore, we tested if rate of  $I_{\text{SKCRAC}}$  activation in Y524S/+ and dCasq-null myotubes was also further increased at physiological temperature 35–37°C (PT). As observed for control myotubes, the rate of  $I_{\text{SKCRAC}}$  activation in Y524S/+ myotubes was also faster at PT (Figure 3 A and B). For the representative experiment shown in Fig. 3 A, T50% was reached only 11.2 s after initiation of the repetitive ramp depolarization protocol, while a similar level of  $I_{\text{SKCRAC}}$  activation took >3-fold longer to develop at RT. On average, T10%, T50%, and T90% were reduced by 81.0%, 67.7%, and 70.9%, respectively at PT (Figure 3 B, Tables S1 and S2 in File S1). Similarly,  $I_{\text{SKCRAC}}$  activation was also significantly faster at physiological temperature (Figure 3 C) in dCasq-null myotubes, with average T10%, T50%, and T90% being reduced 85%, 75%, and 71%, respectively (Figure 3 D and Tables S1 and S2 in File S1). Consistent with these results, the average maximal rate of  $I_{\text{SKCRAC}}$  activation ( $[dI_{\text{Norm}}/dt]_{\text{Max}}$ ) was significantly increased at PT in myotubes from both Y524S/+ and dCasq-null mice (Figure 3 E), though peak steady-state  $I_{\text{SKCRAC}}$  current density was not different between RT and PT in either myotube genotype (Figure 3 F).

The rates of  $I_{\text{SKCRAC}}$  activation at PT in myotubes derived from WT, Y524S/+, and dCasq-null mice were statistically evaluated by ANOVA analysis (control results taken from [24]), although no statistically significant differences were observed for either T10%, T50%, or T90% (Figure S2 A in File S1). However, the maximum rate of  $I_{\text{SKCRAC}}$  activation ( $[dI_{\text{Norm}}/dt]_{\text{Max}}$ ) was significantly increased in myotubes from dCasq-null mice (Figure S2 B in File S1). No differences were observed in either peak  $I_{\text{SKCRAC}}$  current density (Figure S2 C in File S1) or voltage dependence (data not shown).

### Azumolene pretreatment does not alter $I_{\text{SKCRAC}}$ magnitude or rate of activation

Previous studies reported that pretreatment of myotubes and adult muscle fibers with 20  $\mu\text{M}$  azumolene inhibits a component

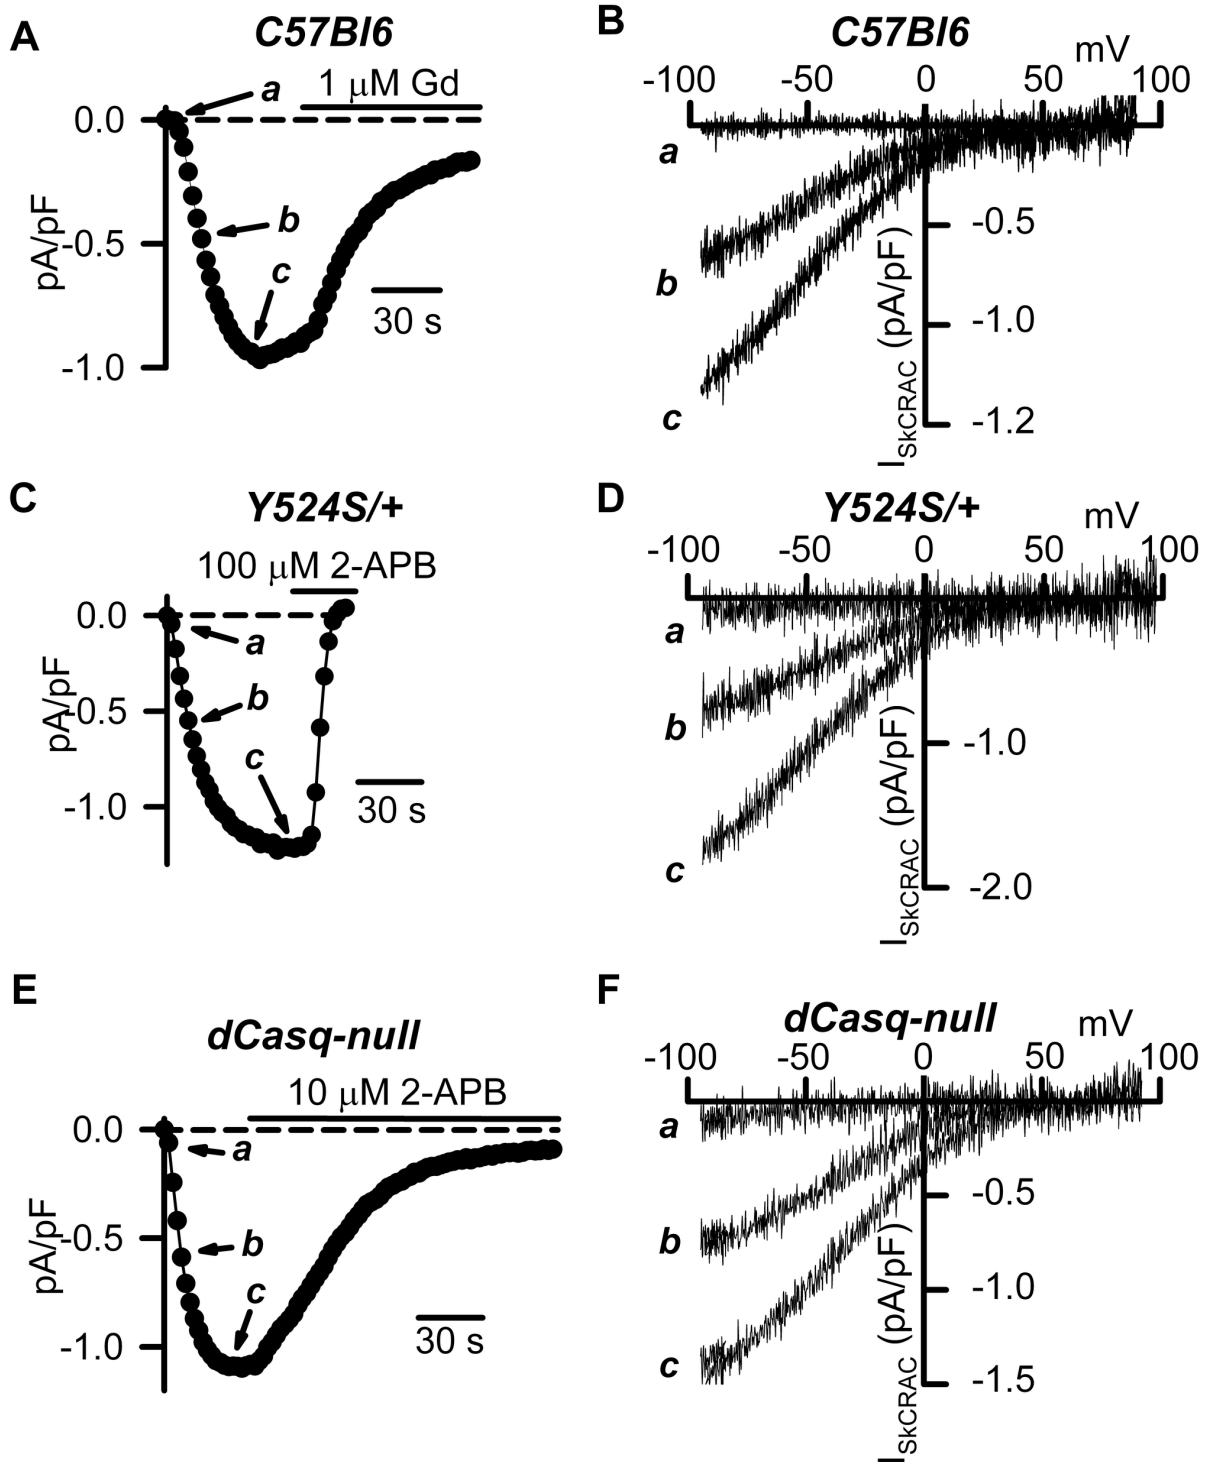

**Figure 1.**  $I_{SKCRAC}$  properties in myotubes from Y524S/+ and dCasq-null mice. (A, C, and E) Representative time courses for  $I_{SKCRAC}$  activation during repetitive ramp depolarization in the presence of 20 mM internal EGTA in myotubes from WT C57Bl6 (A), Y524S/+ (C), and dCasq-null (E) mice.  $I_{SKCRAC}$  was measured at -80 mV and plotted against time. Following full activation,  $I_{SKCRAC}$  was blocked by addition of either 1  $\mu$ M Gd<sup>2+</sup> (A), 100  $\mu$ M 2-APB (C), or 10  $\mu$ M 2-APB (E). Arrows indicate time points a, b, and c used to illustrate  $I_{SKCRAC}$  voltage dependence in panels B, D and F. Dashed lines represent the zero current level and solid lines indicate drug application. (B, D, and F) Voltage dependence of  $I_{SKCRAC}$  for the representative WT C57Bl6 (B), dCasq-null (D), and Y524S/+ (F) myotubes shown in A, C, and E, respectively.

doi: 10.1371/journal.pone.0077633.g001

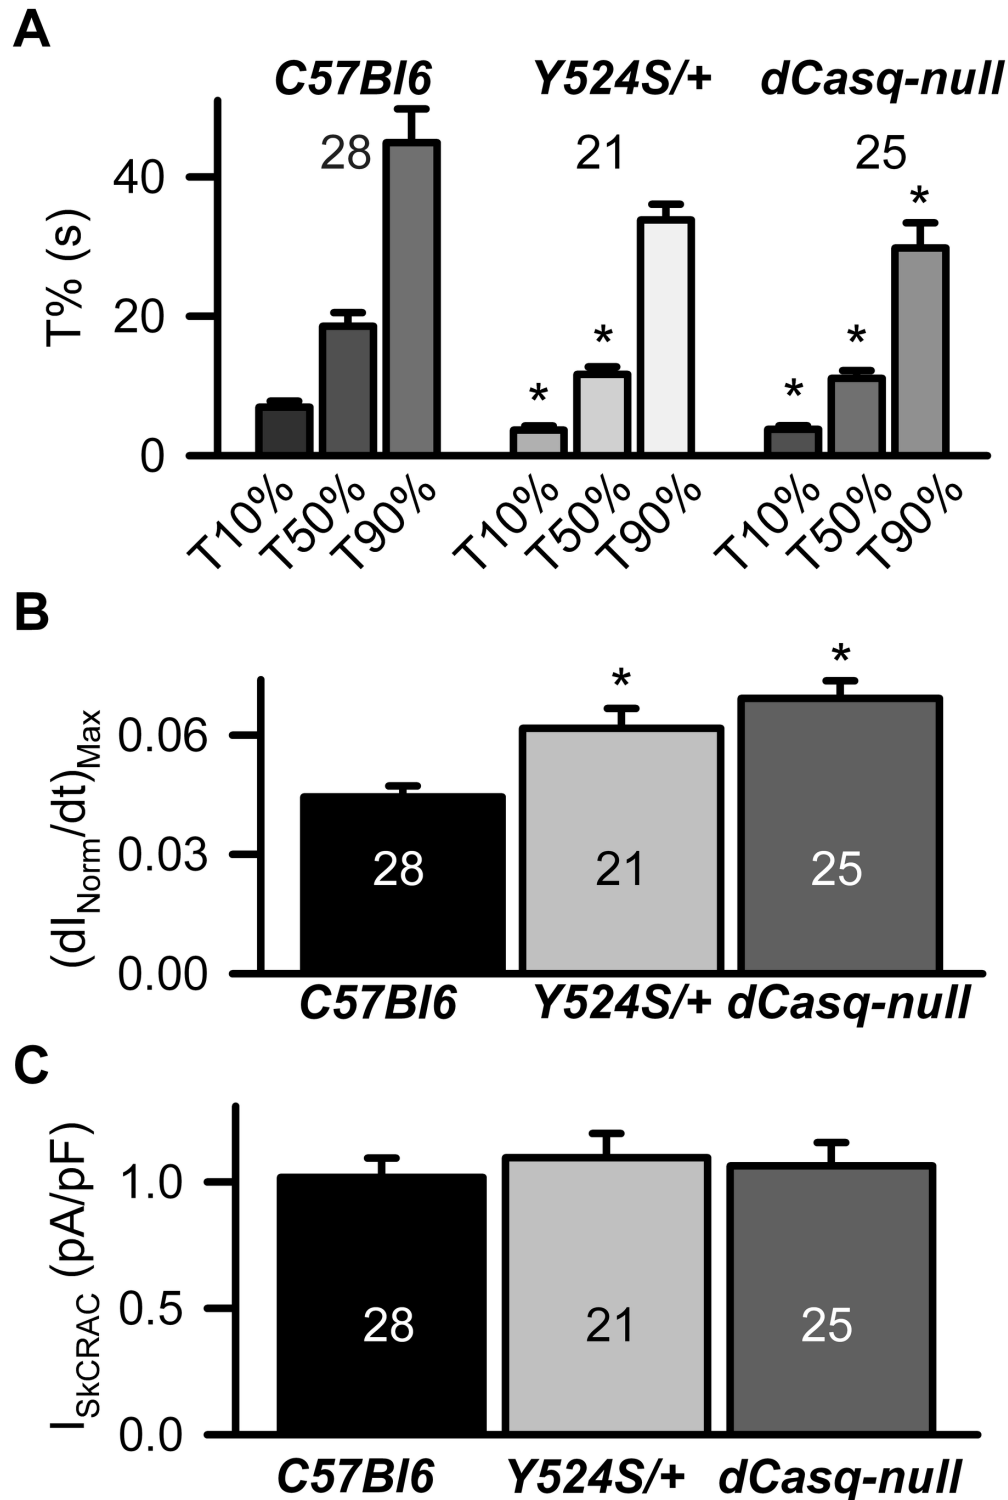

**Figure 2. Rate of  $I_{SkCRAC}$  activation is increased in myotubes from Y524S/+ and dCasq-null mice.** (A) Average ( $\pm$ SE) time required for 10% (T10%), 50% (T50%), and 90% (T90%) activation of  $I_{SkCRAC}$  is significantly increased in myotubes from Y524S/+ and dCasq-null mice. \*Denotes statistically significant differences compared to WT C57Bl6 ( $p < 0.05$ ). (B) Average ( $\pm$ SE) maximum rate of  $I_{SkCRAC}$  activation is increased in myotubes from Y524S/+ and dCasq-null mice. \*Denotes statistically significant differences compared to WT C57Bl6 ( $p < 0.05$ ). (C) Average ( $\pm$ SE) peak  $I_{SkCRAC}$  current density recorded at -80 mV was not different between myotubes from WT C57Bl6, Y524S/+ and dCasq-null mice.

doi: 10.1371/journal.pone.0077633.g002

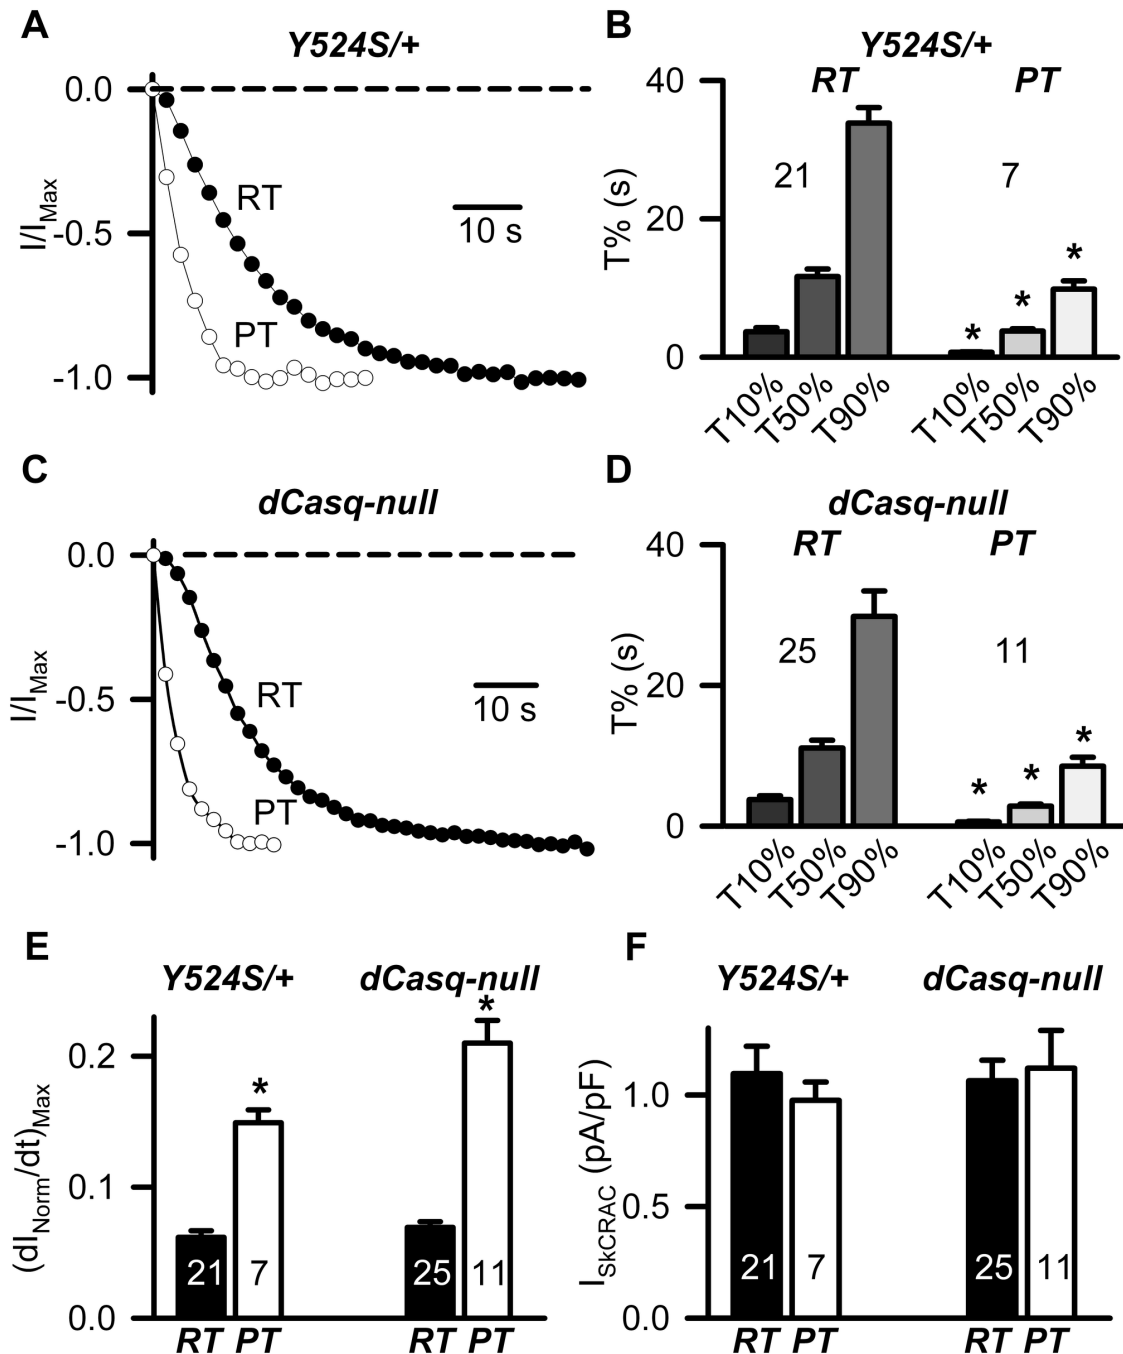

**Figure 3. Rate of  $I_{SKCRAC}$  activation is accelerated at physiological temperature in myotubes from Y524S/+ and dCasq-null mice.** (A) Representative time courses for activation of normalized  $I_{SKCRAC}$  ( $I/I_{Max}$ ) recorded from Y524S/+ myotubes at either room temperature (RT, filled circles) or physiological temperature (PT, open circles). The dashed line represents the zero current level. (B) Average ( $\pm$ SE) time required for 10% (T10%), 50% (T50%), and 90% (T90%)  $I_{SKCRAC}$  activation in Y524S/+ myotubes at RT (left) and PT (right). \*Denotes statistically significant differences compared to RT ( $p < 0.05$ ). (C) Representative time courses for activation of normalized  $I_{SKCRAC}$  ( $I/I_{Max}$ ) recorded from dCasq-null myotubes at either RT (filled circles) or PT (open circles). The dashed line represents the zero current level. (D) Average ( $\pm$ SE) time required for 10% (T10%), 50% (T50%), and 90% (T90%) activation of  $I_{SKCRAC}$  in dCasq-null myotubes at RT (left) and PT (right). (E) Average ( $\pm$ SE) maximum rate of  $I_{SKCRAC}$  activation at RT (filled bars) or PT (open bars) determined from the peak of the first derivative of the  $I/I_{Max}$  time course ( $(dI_{Norm}/dt)_{Max}$ ) in Y524S/+ (left) and dCasq-null (right) myotubes. \*Denotes statistically significant differences compared to RT ( $p < 0.05$ ). (F) Average ( $\pm$ SE) peak  $I_{SKCRAC}$  current density recorded at -80 mV at RT (filled bars) or PT (open bars) in Y524S/+ (left) and dCasq-null (right) myotubes.

doi: 10.1371/journal.pone.0077633.g003

of SOCE coupled to RyR1 activation [23]. However, since these studies employed only indirect measures of SOCE channel function (e.g.  $Mn^{2+}$  quench, reduction in Rhod-2 fluorescence trapped within sealed transverse tubules), potential direct effects of azumolene on SOCE channel function remain unclear. Therefore, we determined the effect of azumolene pretreatment on  $I_{SKCRAC}$  magnitude and rate of activation in whole-cell voltage clamp experiments of WT and Y524S/+ myotubes (Figure 4). Myotubes were first pretreated with either vehicle control or 50  $\mu M$  azumolene for 1 min prior to whole-cell voltage clamping and then maintained in this solution throughout activation of  $I_{SKCRAC}$  as performed in Figures 1-3. The time course of  $I_{SKCRAC}$  activation was not different in the presence or absence of 50  $\mu M$  azumolene in myotubes from both WT (Figure 4 A) and Y524S/+ (Figure 4 B) mice. Consistent with the results shown in Figure 1, the rate of  $I_{SKCRAC}$  activation was faster in Y524S/+ myotubes compared to that of WT myotubes (Figures 4 C-F, Table S3 in File S1). However, pretreatment with 50  $\mu M$  azumolene did not significantly alter T10%, T50%, or T90% activation of  $I_{SKCRAC}$  in myotubes from either WT (Figure 4 C) or Y524S/+ mice (Figure 4 D). Azumolene pretreatment also failed to significantly alter either the maximum rate of  $I_{SKCRAC}$  activation (Figures 4 E and F) or maximal steady-state  $I_{SKCRAC}$  current density (Figure 4 G and H). In addition,  $I_{SKCRAC}$  amplitude was not altered either following washout of pre-applied azumolene or when azumolene was added after  $I_{SKCRAC}$  was fully activated (data not shown). Finally, azumolene pretreatment also failed to significantly alter maximum steady-state  $I_{SKCRAC}$  amplitude in RyR1-null myotubes (control:  $0.74 \pm 1.4$  pA/pF,  $n = 5$ ; azumolene:  $1.08 \pm 0.17$  pA/pF,  $n = 8$ ) or T10%, T50%, and T90%. As a positive control for drug activity, voltage clamp studies found that the maximum rate of depolarization-induced calcium release was significantly reduced ( $15.1 \pm 3.4\%$ ,  $n = 5$ ;  $p < 0.05$ ) within 1 minute after addition of 25  $\mu M$  azumolene. Together, these results indicate that azumolene does not directly inhibit SOCE channels activated during repetitive depolarization.

## Discussion

In this study, we used voltage clamp experiments to directly measure SOCE channel activity (i.e.  $I_{SKCRAC}$  magnitude, voltage dependence, pharmacology, and rate of activation) in myotubes from two different mouse models of heat- and halothane-induced sudden death (i.e. Y524S/+ and dCasq-null mice). We found that rate of  $I_{SKCRAC}$  activation during repetitive depolarization at room temperatures was accelerated in both Y524S/+ and dCasq-null myotubes in the absence of a change in current magnitude or voltage dependence. While the rate of  $I_{SKCRAC}$  activation was increased at PT for all genotypes, the maximum rate of  $I_{SKCRAC}$  activation at PT was significantly faster than WT only for myotubes derived from dCasq-null mice. Finally, we found that azumolene, a more water-soluble dantrolene analogue, did not significantly alter either  $I_{SKCRAC}$  magnitude or rate of activation. These results indicate that while myotubes from MH mice exhibit an increased susceptibility for activation of SOCE during repetitive

depolarization, the SOCE channel in myotubes is not a direct molecular target of azumolene.

## Increased rate of $I_{SKCRAC}$ activation in mouse models of anesthetic/heat-induced sudden death

We found that the rate of  $I_{SKCRAC}$  activation at RT during repetitive depolarization was significantly increased in the absence of a change in maximal SOCE current density in myotubes derived from Y524S/+ and dCasq-null mice, two well-established mouse models of heat- and anesthetic-induced sudden death [10,12,29]. On the other hand, a statistically significant increase in the maximum rate of  $I_{SKCRAC}$  activation at PT was resolved for dCasq-null myotubes, but not for myotubes from both Y524S/+ mice. Given the relatively rapid rate of  $I_{SKCRAC}$  activation observed at 37°C even in WT myotubes (50% activation in ~3 sec while  $I_{SKCRAC}$  is monitored only every 2 sec), our ability to resolve a further increase in activation at the higher temperature is limited. As a result, the data obtained at RT represents a more reliable reflection of the difference in rate of  $I_{SKCRAC}$  activation between myotubes derived from WT mice and those from mice that exhibit halothane- and heat-induced sudden death.

This observed increase in the rate of  $I_{SKCRAC}$  activation in Y524S/+ and dCasq-null myotubes likely reflects a more rapid rate of SR  $Ca^{2+}$  store depletion during repetitive depolarization as a result of either reduced SR  $Ca^{2+}$  storage capacity (dCasq-null myotubes) or enhanced RyR1  $Ca^{2+}$  leak (Y524S/+ myotubes). Our observation that the rate of  $I_{SKCRAC}$  activation is increased in dCasq-null myotubes is consistent with prior reports that Casq-deficiency results in a significant reduction in the time required to achieve store depletion (and thus,  $I_{SKCRAC}$  activation) during both sustained [30] and repetitive [15] depolarization. Since core body temperature can rise up to 43°C (>109°F) during heat stress or anesthetic-induced lethal episodes [2], an increased susceptibility for temperature-dependent store depletion and  $I_{SKCRAC}$  activation would provide strong positive feedback whereby an increase in temperature promotes deeper SR  $Ca^{2+}$  depletion and subsequent enhanced  $Ca^{2+}$  entry through SOCE channels to drive additional  $Ca^{2+}$  entry, uncontrolled muscle contraction, and heat generation. As ATP reserves become used up, SERCA pumps would be unable to adequately refill SR  $Ca^{2+}$  stores, contractile filaments would be unable to relax, and persistent SOCE channel activation would permit massive  $Ca^{2+}$  influx from a near infinite extracellular  $Ca^{2+}$  source. For this reason, inhibition of SOCE channels may represent a novel molecular target to interrupt this destructive positive feedback loop, and thus, prevent and/or rescue patients from deadly heat- and anesthetic-induced MH episodes. However, direct evidence for an increased rate of  $I_{SKCRAC}$  activation in muscle during lethal anesthetic-induced MH events in humans will require further investigation.

## Mechanism of temperature-dependent SOCE channel activation

Since a marked increase in core temperature is a fundamental component of MH crises, we determined the temperature dependence of  $I_{SKCRAC}$  magnitude and rate of

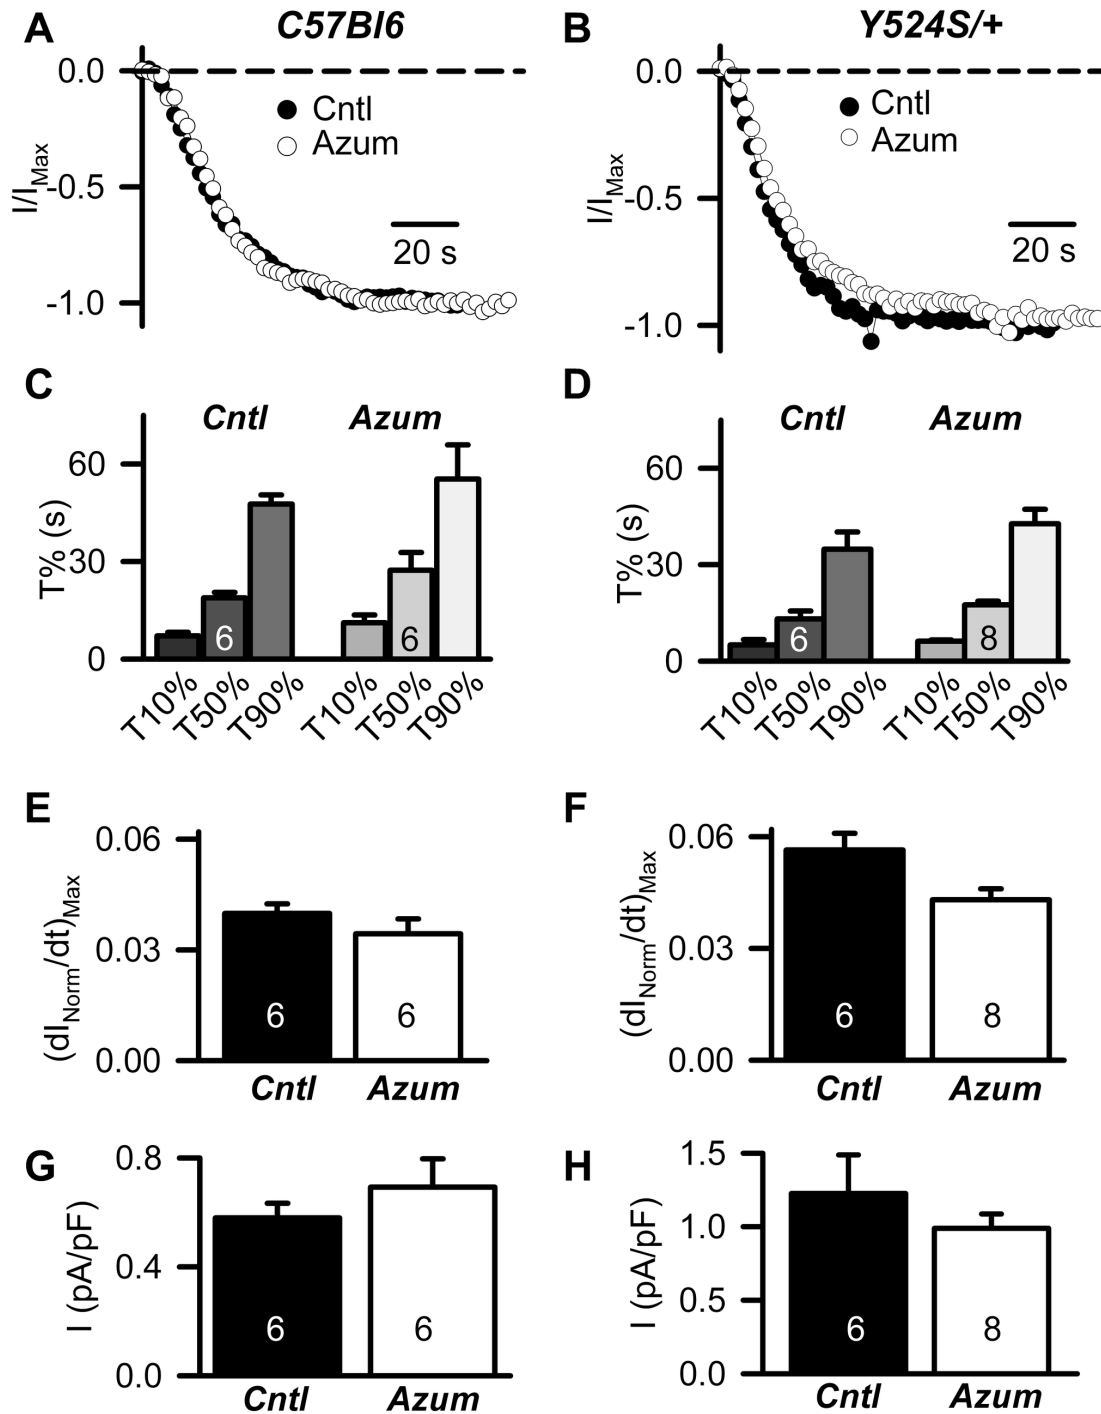

**Figure 4. Azumolene pretreatment does not alter  $I_{SKCRAC}$  magnitude or rate of activation in myotubes from WT C57Bl6 and Y524S/+ mice.** (A and B) Representative time courses for activation of normalized  $I_{SKCRAC}$  ( $I/I_{Max}$ ) recorded from WT C57Bl6 (A) and Y524S/+ (B) myotubes in the absence (filled circles) and presence (open circles) of 50  $\mu$ M azumolene (Azum). (C and D) Average ( $\pm$ SE) time required for 10% (T10%), 50% (T50%), and 90% (T90%) activation of  $I_{SKCRAC}$  in WT C57Bl6 (C) and Y524S/+ (D) myotubes in the absence (left) and presence (right) of 50  $\mu$ M azumolene. (E and F) Average ( $\pm$ SE) maximum rate of  $I_{SKCRAC}$  activation determined from the peak of the first derivative of the  $I/I_{Max}$  time course ( $(dI_{Norm}/dt)_{Max}$ ) in WT C57Bl6 (E) and Y524S/+ (F) myotubes in the absence (left) and presence (right) of 50  $\mu$ M azumolene. (G and H) Average ( $\pm$ SE) peak  $I_{SKCRAC}$  current density recorded at -80 mV in WT C57Bl6 (G) and Y524S/+ (H) myotubes in the absence (left) and presence (right) of 50  $\mu$ M azumolene. All experiments were conducted at room temperature.

doi: 10.1371/journal.pone.0077633.g004



activation during repetitive depolarization. We found that while maximal  $I_{\text{SKCRAC}}$  current density is similar at RT and PT, the rate of  $I_{\text{SKCRAC}}$  activation is significantly faster at PT in myotubes from WT control [24], Y524S/+, and dCasq-null mice (Figure 3). The underlying mechanism for the increase in the rate of  $I_{\text{SKCRAC}}$  activation at PT is unclear, but could theoretically result from a temperature-dependent increase in the rate of SR  $\text{Ca}^{2+}$  depletion, STIM1 multimerization [31], and/or STIM1/Orai1 coupling [24]. However, the effects of temperature on  $I_{\text{SKCRAC}}$  activation are not likely to be due to increased STIM1 multimerization or coupling to Orai1 since near immediate (<1s) SOCE activation occurs even at room temperature upon rapid store depletion [32,33]. Also, the temperature-dependent increase in the rate of SR  $\text{Ca}^{2+}$  depletion is apparently not influenced by Casq1-mediated  $\text{Ca}^{2+}$  buffering or regulation of RyR1 activity since a similar ~3-fold increase in  $I_{\text{SKCRAC}}$  activation rate was observed in myotubes from WT and dCasq-null mice. Thus, we propose that faster  $I_{\text{SKCRAC}}$  activation at PT most likely reflects an increased rate of SR  $\text{Ca}^{2+}$  depletion during repetitive depolarization. This idea is consistent with previous observations that L-type  $\text{Ca}^{2+}$  currents and voltage-gated SR  $\text{Ca}^{2+}$  release exhibit faster kinetics and are activated at more negative voltages [29] at PT. In addition, steady-state “window” RyR1  $\text{Ca}^{2+}$  release exhibits a hyperpolarizing shift in voltage-dependence at elevated temperatures [14]. Moreover, the kinetics of ryanodine binding to SR vesicles, a surrogate for RyR channel activation, is also increased at PT [29]. Together, these results indicate that RyR1-dependent  $\text{Ca}^{2+}$  release, and thus, the rate of SR  $\text{Ca}^{2+}$  depletion and subsequent  $I_{\text{SKCRAC}}$  activation, is increased at PT. Given the increase in core temperature that develops during an MH event, the temperature dependence of  $I_{\text{SKCRAC}}$  activation would be expected to exacerbate myoplasmic  $\text{Ca}^{2+}$  overload. However, additional studies are needed to quantify the temperature dependence of SR  $\text{Ca}^{2+}$  depletion and  $I_{\text{SKCRAC}}$  activation contributes to the myoplasmic  $\text{Ca}^{2+}$  overload uncontrolled muscle contraction, and heat generation that occurs during an MH crisis.

### The role of calsequestrin in SOCE channel regulation

An emerging body of evidence supports the importance of SOCE in skeletal muscle physiology and pathology [21,23,32,34-37]. The role of Casq in retrograde regulation of SOCE in skeletal muscle was first suggested by Ma and colleagues [21-23], where a reciprocal relationship between Casq expression and SOCE function was demonstrated. Specifically, overexpression of Casq1 in myotubes inhibited SOCE [21], while SOCE function was increased following Casq1 knockdown in adult muscle fibers [22]. However, what is unclear from these experiments is whether Casq reduces SOCE channel function by retrograde inhibition of SOCE channel number and/or open probability or by simply making it more difficult for RyR1 to deplete SR  $\text{Ca}^{2+}$  content since Casq markedly increases the local  $\text{Ca}^{2+}$  buffer capacity near sites of RyR1  $\text{Ca}^{2+}$  release ([38]). The direct measurements of  $I_{\text{SKCRAC}}$  magnitude and rate of activation reported here support the later interpretation since Casq deficiency accelerated SOCE channel activation in the absence of a significant effect on

maximum  $I_{\text{SKCRAC}}$  current density. This conclusion is further supported by recent findings that SR  $\text{Ca}^{2+}$  store depletion during repetitive stimulation occurs more rapidly in muscle fibers from Casq1-deficient mice than from WT mice and that the rate required for refilling these stores correlates with stimulation frequency and the degree of SR  $\text{Ca}^{2+}$  depletion, consistent with SOCE channel activation [15].

Using direct electrophysiological measurements of  $I_{\text{SKCRAC}}$  activity, we found that SOCE channel activation during repetitive depolarization is significantly accelerated in myotubes from dCasq-null mice. This increase in the rate of  $I_{\text{SKCRAC}}$  activation in dCasq-null myotubes is consistent with Casq deficiency reducing SR  $\text{Ca}^{2+}$  buffer capacity near sites of RyR1  $\text{Ca}^{2+}$  release, thus making it easier for  $\text{Ca}^{2+}$  release during repetitive depolarization to promote SR  $\text{Ca}^{2+}$  depletion. These findings are also consistent with the enhanced “SR evacuability” (or ability of the SR to empty its contents) [28] and rate of store depletion during repetitive depolarization [15] reported previously in adult muscle fibers from dCasq-null mice. Therefore, we propose that the mechanism for faster  $I_{\text{SKCRAC}}$  activation observed in dCasq-null myotubes is a direct result of reduced SR  $\text{Ca}^{2+}$  buffering making it easier for repetitive depolarization (and RyR1 activation) to deplete junctional SR  $\text{Ca}^{2+}$  content to levels sufficient to open nearby SOCE channels. Consistent with this idea, total SR  $\text{Ca}^{2+}$  content is significantly reduced in Casq-deficient myotubes and muscle fibers [22,39].

Our finding that the maximal rate of  $I_{\text{SKCRAC}}$  activation is accelerated in dCasq-null myotubes are consistent with an increase in the maximal rate of  $\text{Mn}^{2+}$  quench of fura-2 fluorescence after caffeine/ryanodine-induced SR  $\text{Ca}^{2+}$  release in adult muscle fibers following siRNA-mediated knockdown of Casq1 [22]. However, Zhao et al [22] also reported that in spite of an increase in  $\text{Mn}^{2+}$  quench with Casq1 knockdown, expression of Orai1, the protein that forms the  $\text{Ca}^{2+}$  permeable SOCE channel, was reduced. On the other hand, our results indicate that maximal SOCE current density was not significantly altered in dCasq-null myotubes. These apparently divergent results could reflect differences in preparation (adult fibers vs. myotubes), transient/partial versus constitutive/complete Casq1-deficiency, or that Orai1 expression levels are not limiting for SOCE channel function in muscle. In addition, while our studies focus on changes in  $I_{\text{SKCRAC}}$ , which is mediated by STIM1-Orai1 coupling [24], we cannot rule out potential contributions due to changes in other forms of  $\text{Ca}^{2+}$  entry (e.g. STIM1/TrpC channels).

### Azumolene does not directly inhibit $I_{\text{SKCRAC}}$

Dantrolene, a skeletal muscle relaxant [40,41], is currently the only FDA-approved drug for the treatment of MH [1]. Dantrolene, and presumably its more water-soluble analogue azumolene, bind with high affinity to skeletal muscle SR membrane preparations, but not to sarcolemmal or t-tubule membranes [42,43]. A discrete dantrolene binding site within RyR1 (a.a. 590-609) was identified [43] and proposed to suppress RyR1 channel opening [44] by promoting RyR1 interdomain interactions that stabilize the closed state of the channel [45]. While dantrolene reduces electrically-evoked  $\text{Ca}^{2+}$

release in myotubes [46], as well as both SR  $\text{Ca}^{2+}$  release and [ $^3\text{H}$ ]ryanodine binding to SR vesicles [47], two separate studies failed to observe a direct effect of dantrolene on purified RyR1 channel gating following incorporation in artificial planar lipid bilayers [46,48]. An inhibitory effect of dantrolene on excitation-coupled calcium entry [46], likely due inhibition of L-type calcium channel activity [48,49], was demonstrated in both mouse myotubes and adult muscle fibers. In spite of these advances, the precise molecular target by which dantrolene acts to prevent and reverse an MH reaction remains controversial.

The therapeutic action of dantrolene and azumolene in MH was recently suggested to result from an inhibition of SOCE coupled to RyR1 activity [21-23]. Using indirect fura-2  $\text{Ca}^{2+}$  imaging and  $\text{Mn}^{2+}$  quench assays, these studies demonstrated that pretreatment with 20  $\mu\text{M}$  azumolene for 1-2 min inhibited SOCE activated by subsequent addition of caffeine and ryanodine to promote RyR-dependent SR  $\text{Ca}^{2+}$  store depletion in mouse myotubes [23] and adult muscle fibers [22]. Interestingly, SOCE was not reduced when azumolene was added after caffeine and ryanodine application or when applied before thapsigargin-induced store depletion. Based on these results, the authors proposed that dantrolene and azumolene inhibit a specific component of SOCE that is linked to RyR1 channel activity. Under our experimental conditions, we activated SOCE channels in myotubes by repetitive depolarization-induced RyR1  $\text{Ca}^{2+}$  release, while SR  $\text{Ca}^{2+}$  reuptake was inhibited by high concentrations of intracellular EGTA. While this approach activates SOCE linked to RyR1 channel activity [24], we found that neither  $I_{\text{SKCRAC}}$  magnitude nor rate of activation were significantly altered by pretreatment of WT and Y524S/+ myotubes with 50  $\mu\text{M}$  azumolene. Similarly, application of 50  $\mu\text{M}$  azumolene did not significantly alter  $I_{\text{SKCRAC}}$  current density even when applied after maximal  $I_{\text{SKCRAC}}$  activation (data not shown). These data indicate that azumolene is not a direct SOCE channel inhibitor.

If SR  $\text{Ca}^{2+}$  store depletion and uncontrolled  $\text{Ca}^{2+}$  entry through SOCE channels is a key component of an MH reaction as suggested above, how could dantrolene (or azumolene) be highly effective in preventing and reversing MH crises if it does not act by blocking SOCE channels? As one possibility, since Orai1-dependent SOCE lies downstream of store depletion, anesthetic- or heat-induced RyR1-dependent  $\text{Ca}^{2+}$  leak would first lead to store depletion and only then be followed by SOCE activation,  $\text{Ca}^{2+}$  entry, and myoplasmic  $\text{Ca}^{2+}$  overload. According to this mechanism, MH events could be attenuated by agents that either reduce RyR1  $\text{Ca}^{2+}$  leak and store depletion (e.g. dantrolene/azumolene) or directly inhibit Orai1-dependent  $\text{Ca}^{2+}$  influx when stores are depleted (e.g. SOCE channel inhibitors). Moreover, an agent that inhibits RyR1-mediated store depletion (e.g. dantrolene) would be expected to indirectly reduce SOCE activation even if the drug does not directly block the channel once it is activated. While our results demonstrate that azumolene does not directly inhibit Orai1  $\text{Ca}^{2+}$  current, the drug could still indirectly limit  $I_{\text{SKCRAC}}$  activation by protecting stores from becoming depleted. In this context, the reduction in SOCE (i.e.  $\text{Mn}^{2+}$  quench) when azumolene was applied prior to caffeine/ryanodine exposure reported

previously [21-23] could be the result of the drug reducing RyR1  $\text{Ca}^{2+}$  release, and thus, limiting the relative degree of SR  $\text{Ca}^{2+}$  store depletion and SOCE activation achieved.

## Conclusions

We used a previously described voltage clamp approach [24] to directly quantify the activation rate, magnitude, electrophysiological properties, and pharmacological signature of SOCE channel function ( $I_{\text{SKCRAC}}$ ) in myotubes derived from two separate mouse models for heat- and anesthetic-induced MH. We demonstrated a similar significant increase in the rate of  $I_{\text{SKCRAC}}$  activation during repetitive stimulation in myotubes derived from both models. While dantrolene and azumolene may minimize  $I_{\text{SKCRAC}}$  activation by reducing RyR1  $\text{Ca}^{2+}$  release, and thus store depletion, the drugs do not directly inhibit SOCE channels. Nevertheless, it will be important for future work to determine the potential therapeutic value of inhibiting SOCE channels in skeletal muscle in the prevention and management of MH environmental/exertional heat illness.

## Supporting Information

**File S1. Table S1.** Times for 10%, 50%, and 90% activation of  $I_{\text{SKCRAC}}$  at room temperature in C57Bl6, Y524S/+, and dCasq-null myotubes. **Table S2.** Times for 10%, 50%, and 90% activation of  $I_{\text{SKCRAC}}$  at physiological temperature in C57Bl6, Y524S/+, and dCasq-null myotubes. **Table S3.** Effect of azumolene (Azum, 50  $\mu\text{M}$ ) on times for 10%, 50%, and 90% activation of  $I_{\text{SKCRAC}}$  at in C57Bl6 and Y524S/+ myotubes. **Figure S1.  $I_{\text{SKCRAC}}$  current density and pharmacology.** (A) Average ( $\pm\text{SE}$ )  $I_{\text{SKCRAC}}$  current density recorded from WT C57Bl6, Y524S/+, and dCasq-null myotubes at -80 mV in control (Cntl, *filled bars*) and after addition of 1  $\mu\text{M}$   $\text{Gd}^{3+}$  (*open bars*). Data for wild-type are taken from Yarotsky and Dirksen (2012). Numbers of paired experiments are shown in bars. \* $p < 0.05$ . (B) Average ( $\pm\text{SE}$ )  $I_{\text{SKCRAC}}$  current density recorded from WT C57Bl6, Y524S/+, and dCasq-null myotubes at -80 mV in control (Cntl, *black bars*) and after addition of either 100  $\mu\text{M}$  (C57Bl6 and Y524S/+) or 10  $\mu\text{M}$  (dCasq-null) 2-APB (*open bars*). Numbers of paired experiments are shown in bars. \* $p < 0.05$ . **Figure S2. The effect of PT on  $I_{\text{SKCRAC}}$  magnitude and activation rate in myotubes from WT C57Bl6, Y524S/+, and dCasq-null mice.** (A) Average ( $\pm\text{SE}$ ) time required for 10% (T10%), 50% (T50%), and 90% (T90%) activation of  $I_{\text{SKCRAC}}$  in WT C57Bl6, Y524S/+, and dCasq-null myotubes. (B) Average ( $\pm\text{SE}$ ) maximum rate of  $I_{\text{SKCRAC}}$  activation in WT C57Bl6, Y524S/+, and dCasq-null myotubes. \* $p < 0.05$ . (C) Average ( $\pm\text{SE}$ ) peak  $I_{\text{SKCRAC}}$  current density recorded at -80 mV in myotubes from WT, Y524S/+, and dCasq-null mice. (DOCX)

## Acknowledgements

We thank Dr. Jerome Parness for providing the azumolene used in this study, Sara Geitner and Megan Leyrer for superb technical assistance in culturing myotubes, and Dr. Keith S. Elmslie (Kirksville College of Osteopathic Medicine, AT Still

University) for critical review of an early version of the manuscript.

## Author Contributions

Conceived and designed the experiments: VY FP RTD.  
Performed the experiments: VY. Analyzed the data: VY.

## References

- Rosenberg H, Sambuughin N, Dirksen R (2010) Malignant hyperthermia susceptibility: In: GeneReviews at GeneTests: Medical Genetics Information Resource [database online]. Copyright, Seattle: University of Washington, 1997-2010
- Larach MG, Brandom BW, Allen GC, Gronert GA, Lehman EB (2008) Cardiac arrests and deaths associated with malignant hyperthermia in north america from 1987 to 2006: a report from the north american malignant hyperthermia registry of the malignant hyperthermia association of the United States. *Anesthesiology* 108: 603-611. doi: 10.1097/ALN.0b013e318167aee2. PubMed: 18362591.
- Hopkins PM, Ellis FR, Halsall PJ (1991) Evidence for related myopathies in exertional heat stroke and malignant hyperthermia. *Lancet* 338: 1491-1492. doi:10.1016/0140-6736(91)92304-K. PubMed: 1683922.
- Tobin JR, Jason DR, Challa VR, Nelson TE, Sambuughin N (2001) Malignant hyperthermia and apparent heat stroke. *JAMA* 286: 168-169. doi:10.1001/jama.286.2.168. PubMed: 11448278.
- Wappler F, Fiege M, Steinfath M, Agarwal K, Scholz J et al. (2001) Evidence for susceptibility to malignant hyperthermia in patients with exercise-induced rhabdomyolysis. *Anesthesiology* 94: 95-100. doi: 10.1097/00000542-200101000-00019. PubMed: 11135728.
- Davis M, Brown R, Dickson A, Horton H, James D et al. (2002) Malignant hyperthermia associated with exercise-induced rhabdomyolysis or congenital abnormalities and a novel RYR1 mutation in New Zealand and Australian pedigrees. *Br J Anaesth* 88: 508-515. doi:10.1093/bja/88.4.508. PubMed: 12066726.
- Capacchione JF, Muldoon SM (2009) The relationship between exertional heat illness, exertional rhabdomyolysis, and malignant hyperthermia. *Anesth Analg* 109: 1065-1069. doi:10.1213/ane.0b013e3181a9d8d9. PubMed: 19617585.
- Nishio H, Sato T, Fukunishi S, Tamura A, Iwata M et al. (2009) Identification of malignant hyperthermia-susceptible ryanodine receptor type 1 gene (RYR1) mutations in a child who died in a car after exposure to a high environmental temperature. *Leg Med (Tokyo)* 11: 142-143. doi:10.1016/j.legalmed.2008.12.004.
- Groom L, Muldoon SM, Tang ZZ, Brandom BW, Bayarsaikhan M et al. (2011) Identical de novo mutation in the type 1 ryanodine receptor gene associated with fatal, stress-induced malignant hyperthermia in two unrelated families. *Anesthesiology* 115: 938-945. doi:10.1097/ALN.0b013e3182320068. PubMed: 21918424.
- Chelu MG, Goonasekera SA, Durham WJ, Tang W, Lueck JD et al. (2006) Heat- and anesthesia-induced malignant hyperthermia in an RyR1 knock-in mouse. *FASEB J* 20: 329-330. PubMed: 16284304.
- Yang T, Riehl J, Esteve E, Matthaehi KI, Goth S et al. (2006) Pharmacologic and functional characterization of malignant hyperthermia in the R163C RyR1 knock-in mouse. *Anesthesiology* 105: 1164-1175. doi:10.1097/00000542-200612000-00016. PubMed: 17122579.
- Dainese M, Quarta M, Lyfenko AD, Paolini C, Canato M et al. (2009) Anesthetic- and heat-induced sudden death in calsequestrin-1-knockout mice. *FASEB J* 23: 1710-1720. doi:10.1096/fj.08-121335. PubMed: 19237502.
- Protasi F, Paolini C, Dainese M (2009) Calsequestrin-1: a new candidate gene for malignant hyperthermia and exertional/environmental heat stroke. *J Physiol* 587: 3095-3100. doi:10.1113/jphysiol.2009.171967. PubMed: 19417098.
- Andronache Z, Hamilton SL, Dirksen RT, Melzer W (2009) A retrograde signal from RyR1 alters DHP receptor inactivation and limits window Ca<sup>2+</sup> release in muscle fibers of Y522S RyR1 knock-in mice. *Proc Natl Acad Sci U S A* 106: 4531-4536. doi:10.1073/pnas.0812661106. PubMed: 19246389.
- Canato M, Scorzeto M, Giacomello M, Protasi F, Reggiani C et al. (2010) Massive alterations of sarcoplasmic reticulum free calcium in skeletal muscle fibers lacking calsequestrin revealed by a genetically encoded probe. *Proc Natl Acad Sci U S A* 107: 22326-22331. doi: 10.1073/pnas.1009168108. PubMed: 21135222.
- Nelson TE, Bedell DM, Jones EW (1975) Porcine malignant hyperthermia: effects of temperature and extracellular calcium concentration on halothane-induced contracture of susceptible skeletal muscle. *Anesthesiology* 42: 301-306. doi: 10.1097/00000542-197503000-00011. PubMed: 1115384.
- Nelson TE, Chausmer AB (1981) Calcium content and contracture in isolated muscle of malignant hyperthermia in pigs. *J Pharmacol Exp Ther* 219: 107-111. PubMed: 7288598.
- Fletcher JE, Huggins FJ, Rosenberg H (1990) The importance of calcium ions for in vitro malignant hyperthermia testing. *Can J Anaesth* 37: 695-698. doi:10.1007/BF03006495. PubMed: 2208545.
- Adnet PJ, Krivosic-Horber RM, Adamantidis MM, Reyford H, Cordonnier C et al. (1991) Effects of calcium-free solution, calcium antagonists, and the calcium agonist BAY K 8644 on mechanical responses of skeletal muscle from patients susceptible to malignant hyperthermia. *Anesthesiology* 75: 413-419. doi: 10.1097/00000542-199109001-00413. PubMed: 1716078.
- Duke AM, Hopkins PM, Calaghan SC, Halsall JP, Steele DS (2010) Store-operated Ca<sup>2+</sup> entry in malignant hyperthermia-susceptible human skeletal muscle. *J Biol Chem* 285: 25645-25653. doi:10.1074/jbc.M110.104976. PubMed: 20566647.
- Shin DW, Pan Z, Kim EK, Lee JM, Bhat MB et al. (2003) A retrograde signal from calsequestrin for the regulation of store-operated Ca<sup>2+</sup> entry in skeletal muscle. *J Biol Chem* 278: 3286-3292. doi:10.1074/jbc.M209045200. PubMed: 12419813.
- Zhao X, Min CK, Ko JK, Parness J, Kim do H et al. (2010) Increased store-operated Ca<sup>2+</sup> entry in skeletal muscle with reduced calsequestrin-1 expression. *Biophys J* 99: 1556-1564. doi:10.1016/j.bpj.2010.06.050. PubMed: 20816068.
- Zhao X, Weisleder N, Han X, Pan Z, Parness J et al. (2006) Azumolene inhibits a component of store-operated calcium entry coupled to the skeletal muscle ryanodine receptor. *J Biol Chem* 281: 33477-33486. doi:10.1074/jbc.M602306200. PubMed: 16945924.
- Yarotsky V, Dirksen RT (2012) Temperature and RyR1 Regulate the Activation Rate of Store-Operated Ca(2+) Entry Current in Myotubes. *Biophys J* 103: 202-211. doi:10.1016/j.bpj.2012.06.001. PubMed: 22853897.
- Avila G, Dirksen RT (2000) Functional impact of the ryanodine receptor on the skeletal muscle L-type Ca(2+) channel. *J Gen Physiol* 115: 467-480. doi:10.1085/jgp.115.4.467. PubMed: 10736313.
- Wang Y, Xu L, Duan H, Pasek DA, Eu JP et al. (2006) Knocking down type 2 but not type 1 calsequestrin reduces calcium sequestration and release in C2C12 skeletal muscle myotubes. *J Biol Chem* 281: 15572-15581. doi:10.1074/jbc.M600090200. PubMed: 16595676.
- Paolini C, Quarta M, d'Onofrio L, Reggiani C, Protasi F (2011) Differential effect of calsequestrin ablation on structure and function of fast and slow twitch skeletal fibers. *J Biomed Biotechnol (In press)*.
- Royer L, Sztretye M, Manno C, Pouvreau S, Zhou J et al. (2010) Paradoxical buffering of calcium by calsequestrin demonstrated for the calcium store of skeletal muscle. *J Gen Physiol* 136: 325-338. doi: 10.1085/jgp.201010454. PubMed: 20713548.
- Durham WJ, Aracena-Parks P, Long C, Rossi AE, Goonasekera SA et al. (2008) RyR1 S-nitrosylation underlies environmental heat stroke and sudden death in Y522S RyR1 knockin mice. *Cell* 133: 53-65. doi: 10.1016/j.cell.2008.02.042. PubMed: 18394989.
- Sztretye M, Yi J, Figueroa L, Zhou J, Royer L et al. (2011) Measurement of RyR permeability reveals a role of calsequestrin in termination of SR Ca(2+) release in skeletal muscle. *J Gen Physiol* 138: 231-247. doi:10.1085/jgp.201010592. PubMed: 21788611.
- Xiao B, Coste B, Mathur J, Patapoutian A (2011) Temperature-dependent STIM1 activation induces Ca(2+)-influx and modulates gene expression. *Nat Chem Biol* 7: 351-358. doi:10.1038/nchembio.558. PubMed: 21499266.
- Launikonis BS, Rios E (2007) Store-operated Ca<sup>2+</sup> entry during intracellular Ca<sup>2+</sup> release in mammalian skeletal muscle. *J Physiol* 583: 81-97. doi:10.1113/jphysiol.2007.135046. PubMed: 17569733.

Contributed reagents/materials/analysis tools: FP RTD. Wrote the manuscript: VY FP RTD.

33. Edwards JN, Murphy RM, Cully TR, von Wegner F, Friedrich O et al. (2010) Ultra-rapid activation and deactivation of store-operated Ca(2+) entry in skeletal muscle. *Cell Calcium* 47: 458-467. doi:10.1016/j.ceca.2010.04.001. PubMed: 20434768.
34. Dirksen RT (2009) Checking your SOCCs and feet: the molecular mechanisms of Ca2+ entry in skeletal muscle. *J Physiol* 587: 3139-3147. doi:10.1113/jphysiol.2009.172148. PubMed: 19406875.
35. Pan Z, Yang D, Nagaraj RY, Nosek TA, Nishi M et al. (2002) Dysfunction of store-operated calcium channel in muscle cells lacking mg29. *Nat Cell Biol* 4: 379-383. doi:10.1038/ncb788. PubMed: 11988740.
36. Lyfenko AD, Dirksen RT (2008) Differential dependence of store-operated and excitation-coupled Ca2+ entry in skeletal muscle on STIM1 and Orai1. *J Physiol* 586: 4815-4824. doi:10.1113/jphysiol.2008.160481. PubMed: 18772199.
37. Launikonis BS, Barnes M, Stephenson DG (2003) Identification of the coupling between skeletal muscle store-operated Ca2+ entry and the inositol trisphosphate receptor. *Proc Natl Acad Sci U S A* 100: 2941-2944. doi:10.1073/pnas.0536227100. PubMed: 12601149.
38. Launikonis BS, Zhou J, Royer L, Shannon TR, Brum G et al. (2006) Depletion "skraps" and dynamic buffering inside the cellular calcium store. *Proc Natl Acad Sci U S A* 103: 2982-2987. doi:10.1073/pnas.0511252103. PubMed: 16473932.
39. Paolini C, Quarta M, Nori A, Boncompagni S, Canato M et al. (2007) Reorganized stores and impaired calcium handling in skeletal muscle of mice lacking calsequestrin-1. *J Physiol* 583: 767-784. doi:10.1113/jphysiol.2007.138024. PubMed: 17627988.
40. Harrison GG (1975) Control of the malignant hyperpyrexia syndrome in MHS swine by dantrolene sodium. *Br J Anaesth* 47: 62-65. doi: 10.1093/bja/47.1.62. PubMed: 1148076.
41. Wappler F (2010) Anesthesia for patients with a history of malignant hyperthermia. *Curr Opin Anaesthesiol*, 23: 417-22. PubMed: 20173632.
42. Palnitkar SS, Mickelson JR, Louis CF, Parness J (1997) Pharmacological distinction between dantrolene and ryanodine binding sites: evidence from normal and malignant hyperthermia-susceptible porcine skeletal muscle. *Biochem J* 326 ( 3): 847-852. PubMed: 9307036.
43. Parness J, Palnitkar SS (1995) Identification of dantrolene binding sites in porcine skeletal muscle sarcoplasmic reticulum. *J Biol Chem* 270: 18465-18472. doi:10.1074/jbc.270.31.18465. PubMed: 7629173.
44. Zhang Y, Rodney GG, Schneider MF (2005) Effects of azumolene on Ca2+ sparks in skeletal muscle fibers. *J Pharmacol Exp Ther* 314: 94-102. doi:10.1124/jpet.105.084046. PubMed: 15831441.
45. Kobayashi S, Bannister ML, Gangopadhyay JP, Hamada T, Parness J et al. (2005) Dantrolene stabilizes domain interactions within the ryanodine receptor. *J Biol Chem* 280: 6580-6587. doi:10.1074/jbc.M408375200. PubMed: 15611117.
46. Cherednichenko G, Ward CW, Feng W, Cabrales E, Michaelson L et al. (2008) Enhanced excitation-coupled calcium entry in myotubes expressing malignant hyperthermia mutation R163C is attenuated by dantrolene. *Mol Pharmacol* 73: 1203-1212. doi:10.1124/mol.107.043299. PubMed: 18171728.
47. Fruen BR, Mickelson JR, Louis CF (1997) Dantrolene inhibition of sarcoplasmic reticulum Ca2+ release by direct and specific action at skeletal muscle ryanodine receptors. *J Biol Chem* 272: 26965-26971. doi:10.1074/jbc.272.43.26965. PubMed: 9341133.
48. Szentesi P, Collet C, Sárközi S, Szegedi C, Jona I et al. (2001) Effects of dantrolene on steps of excitation-contraction coupling in mammalian skeletal muscle fibers. *J Gen Physiol* 118: 355-375. doi:10.1085/jgp.118.4.355. PubMed: 11585849.
49. Bannister RA, Pessah IN, Beam KG (2009) The skeletal L-type Ca(2+) current is a major contributor to excitation-coupled Ca(2+) entry. *J Gen Physiol* 133: 79-91. doi:10.1085/jgp.200810105. PubMed: 19114636.
